# Supplementary material
Source: PubMed Central journal article supplement (PMC11422902)
Supplement: NIHPP2023.05.17.541057v8-supplement-1.pdf [file NIHPP2023.05.17.541057v8-supplement-1.pdf]

931

## Supplementary Figures

Examples of interneuron muted animals producing abnormally long vocalizations

A

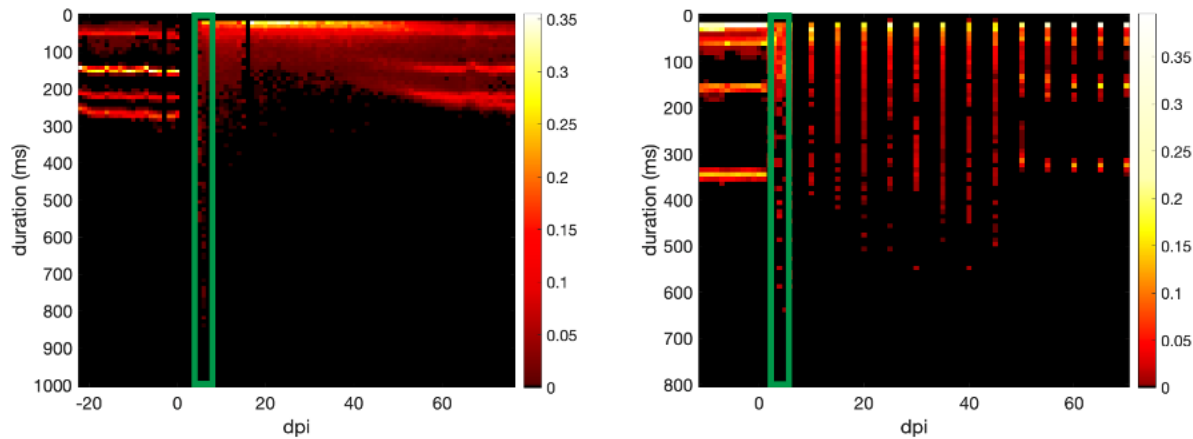

B

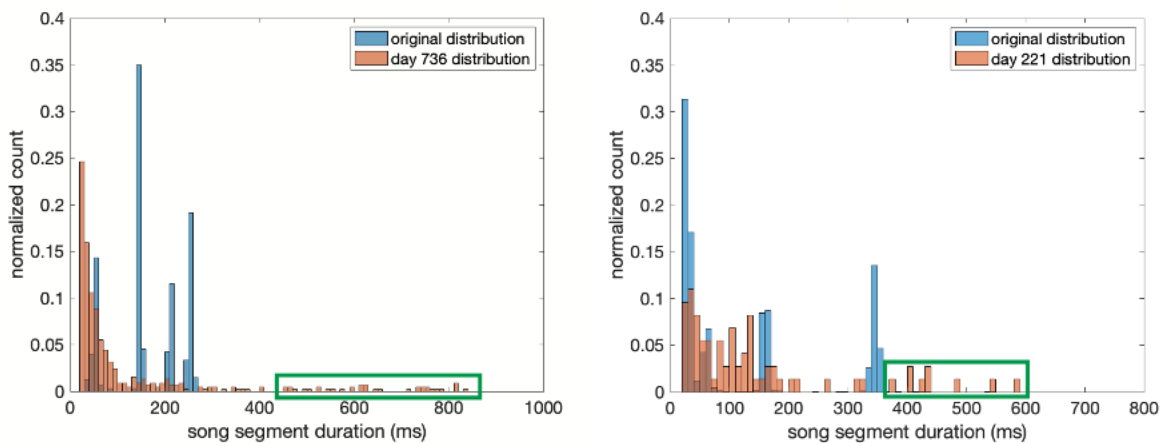

9;  
933 **Supplementary Figure 1: Examples of abnormally long syllable lengths after injection of interneuron muting virus in two animals.** A  
934 Syllable length durations for the length of song degradation and recovery. The Y axis depicts the length of the syllables in milliseconds  
935 plotted over days post-injection (dpi) of either TeNT virus. TeNT-treated animals displayed a short period during which some  
936 vocalizations were of length not observed in normal animals and eventually became highly variable and shorter (shifts to shorter length  
937 sounds). The green rectangle highlights the day post-injection portrayed in B for each animal. **B** Histogram of syllable durations (blue  
938 trace is before injection of virus, orange trace is after injection of virus). The green rectangle highlights vocalizations of abnormal  
939 length.  
940

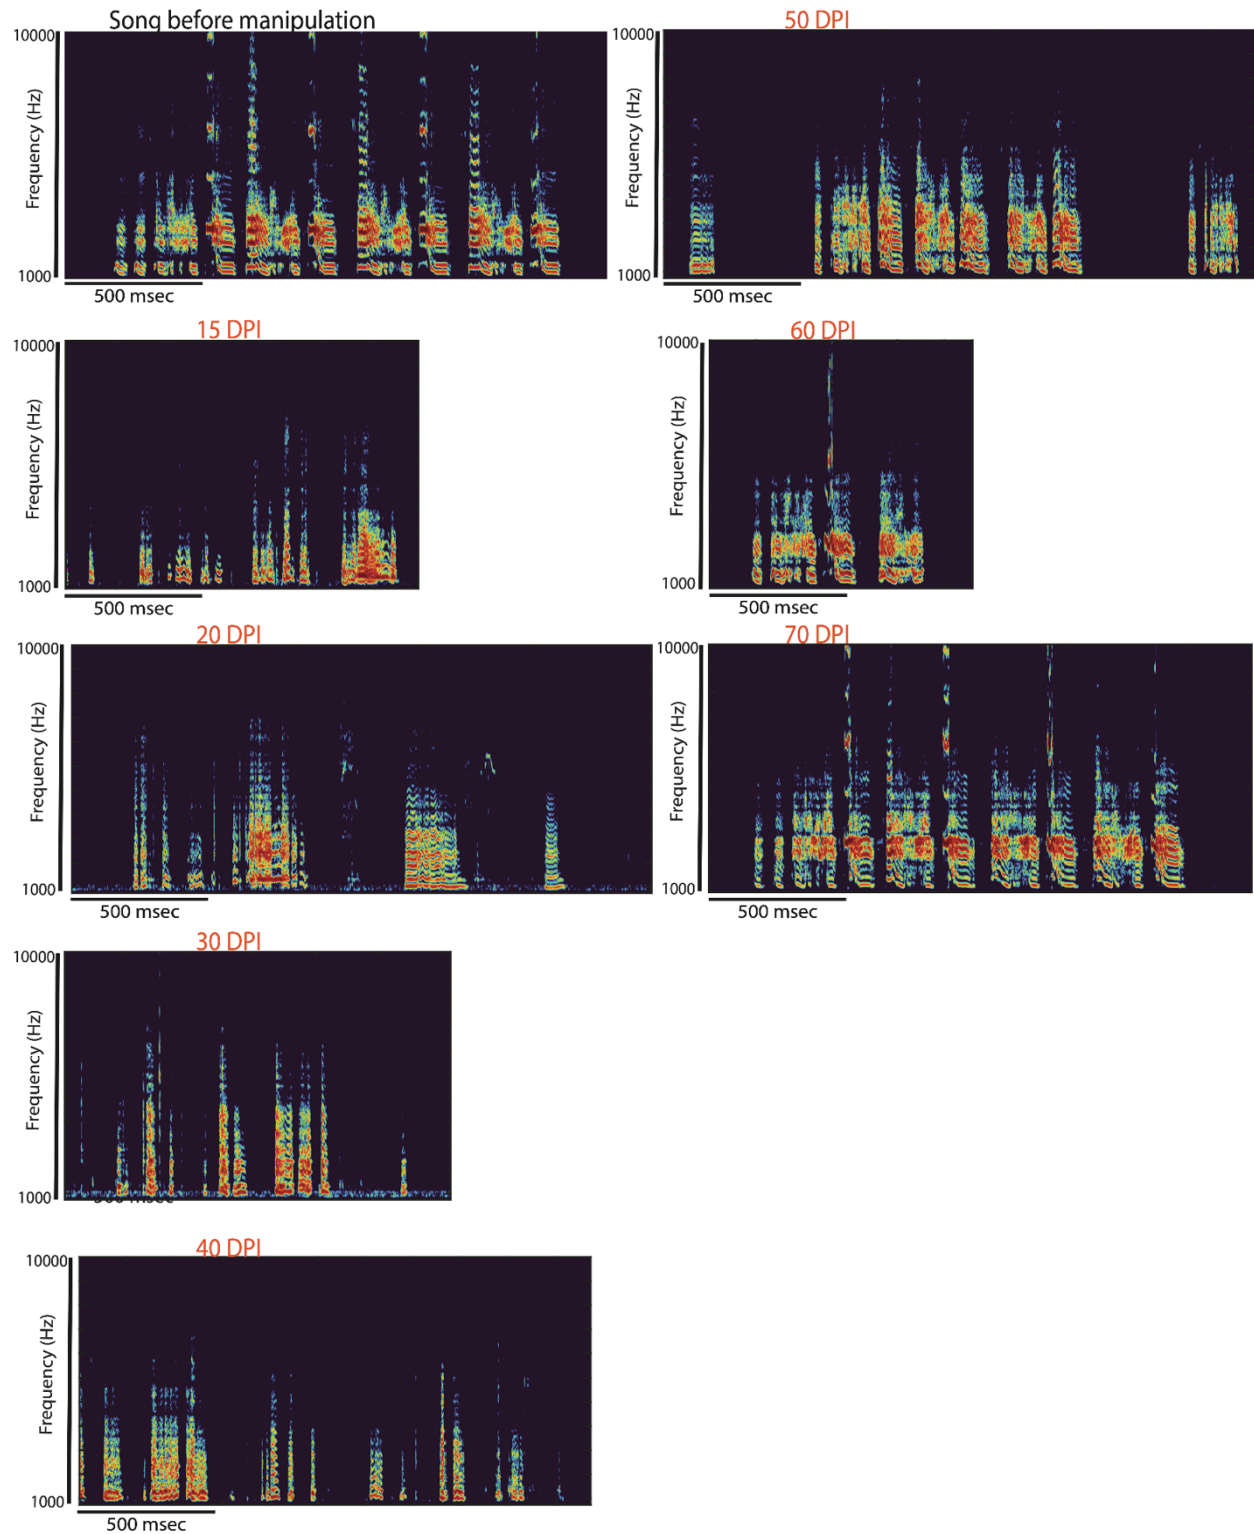

941

942 *Supplementary Figure 2: Example spectrograms of a TeNT-treated animal (B138) during song degradation and recovery.*

943 *Vocalizations between 15 dpi and 30 dpi were much shorter than the first long syllables shown in Figure 1 A at 5 dpi.*

944

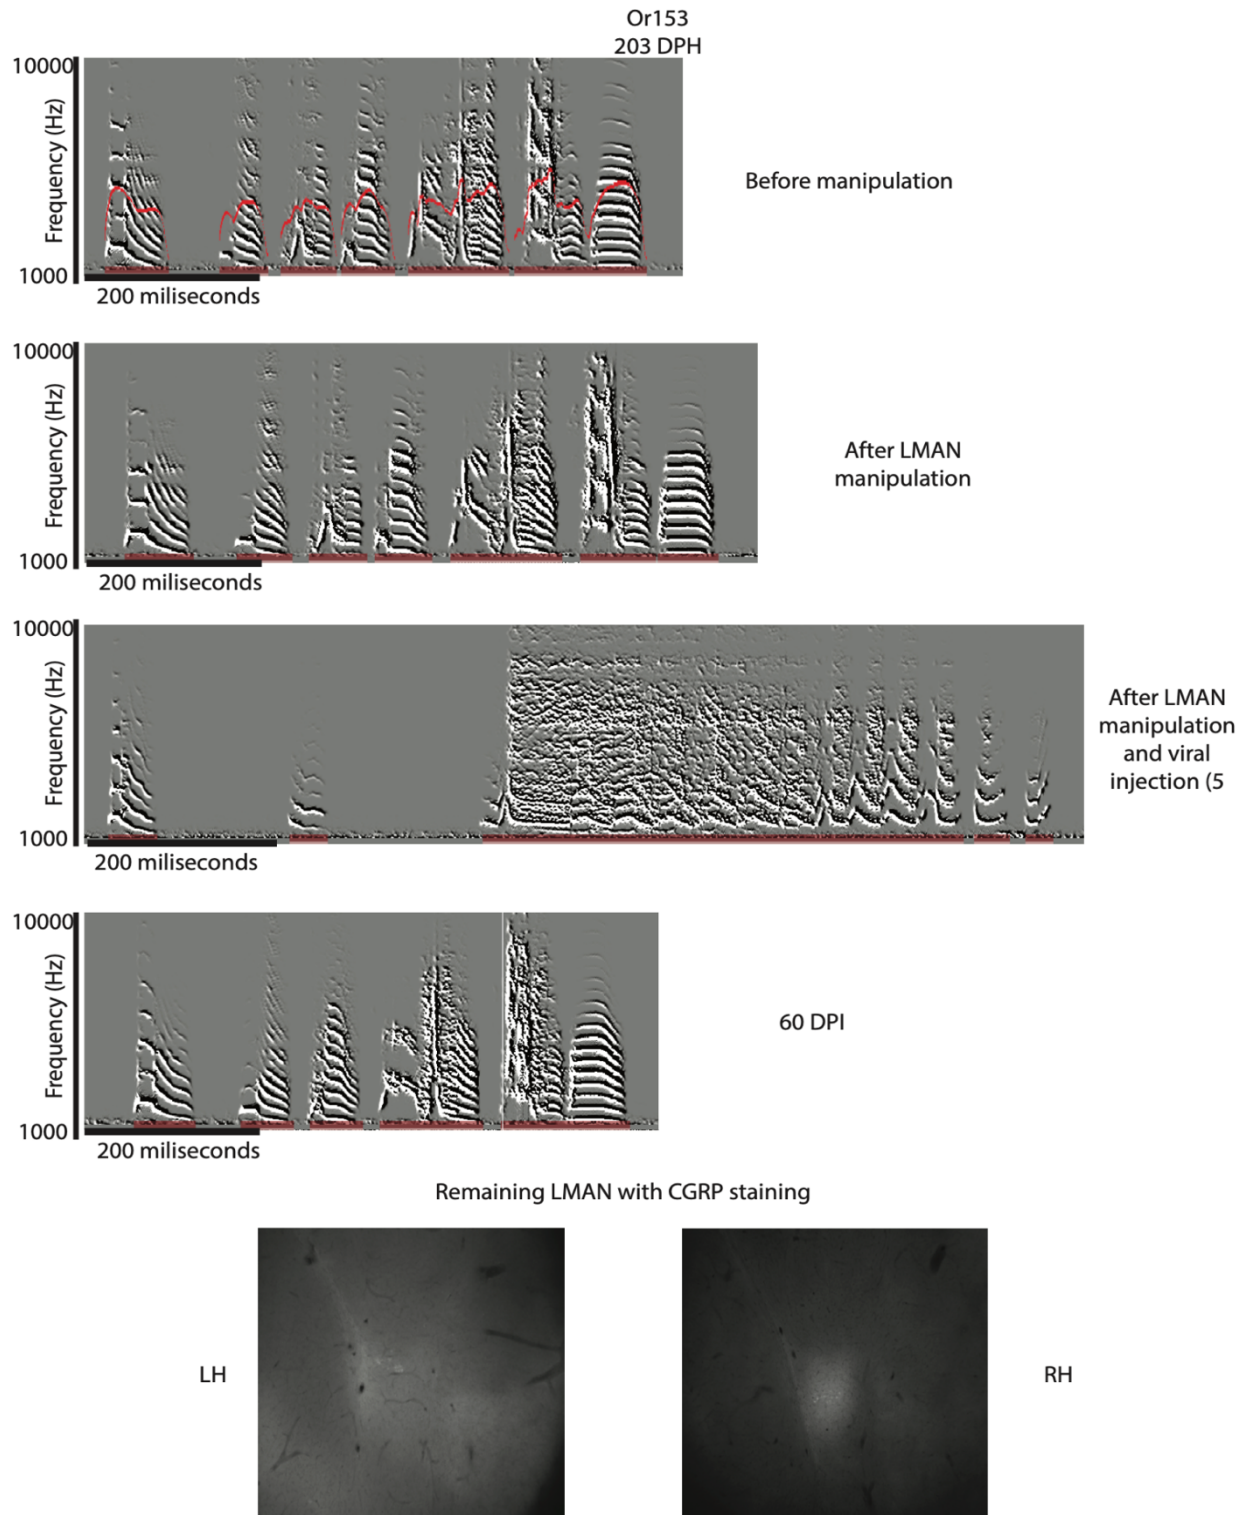

945

946 **Supplementary Figure 3: Song degradation and recovery after chronic removal of inhibition in an animal without LMAN.** Spectrograms  
947 are showing the song of the animal before and after LMAN lesion at 5 and 40 days post viral injection (dpi). The histology image shows  
948 the amount of LMAN left (based on CGRP staining) in the right hemisphere (RH).

949

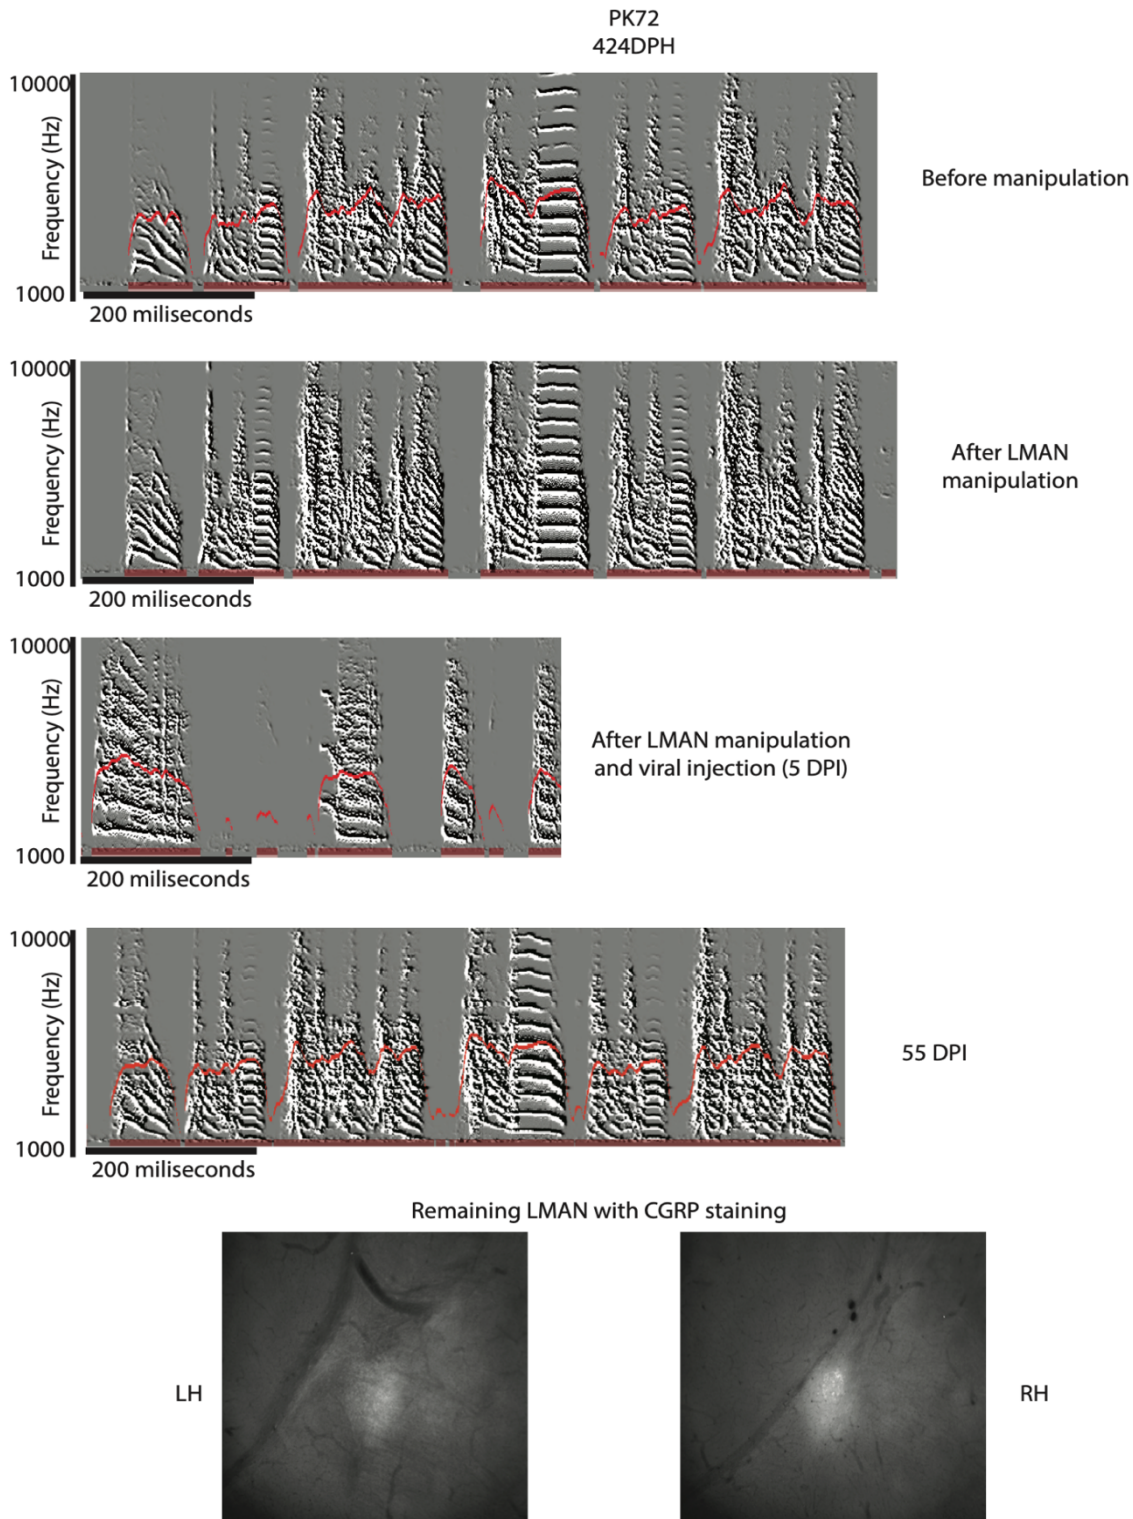

950 **Supplementary Figure 4: Song degradation and recovery after chronic removal of inhibition in an animal**  
951 **without LMAN.** Spectrograms are showing the song of the animal before and after LMAN lesion at 5 and 60  
952 days post viral injection (dpi). The histology images indicate the amount of LMAN left (based on CGRP  
953 staining) in the left (LH) and right (RH) hemispheres.

954

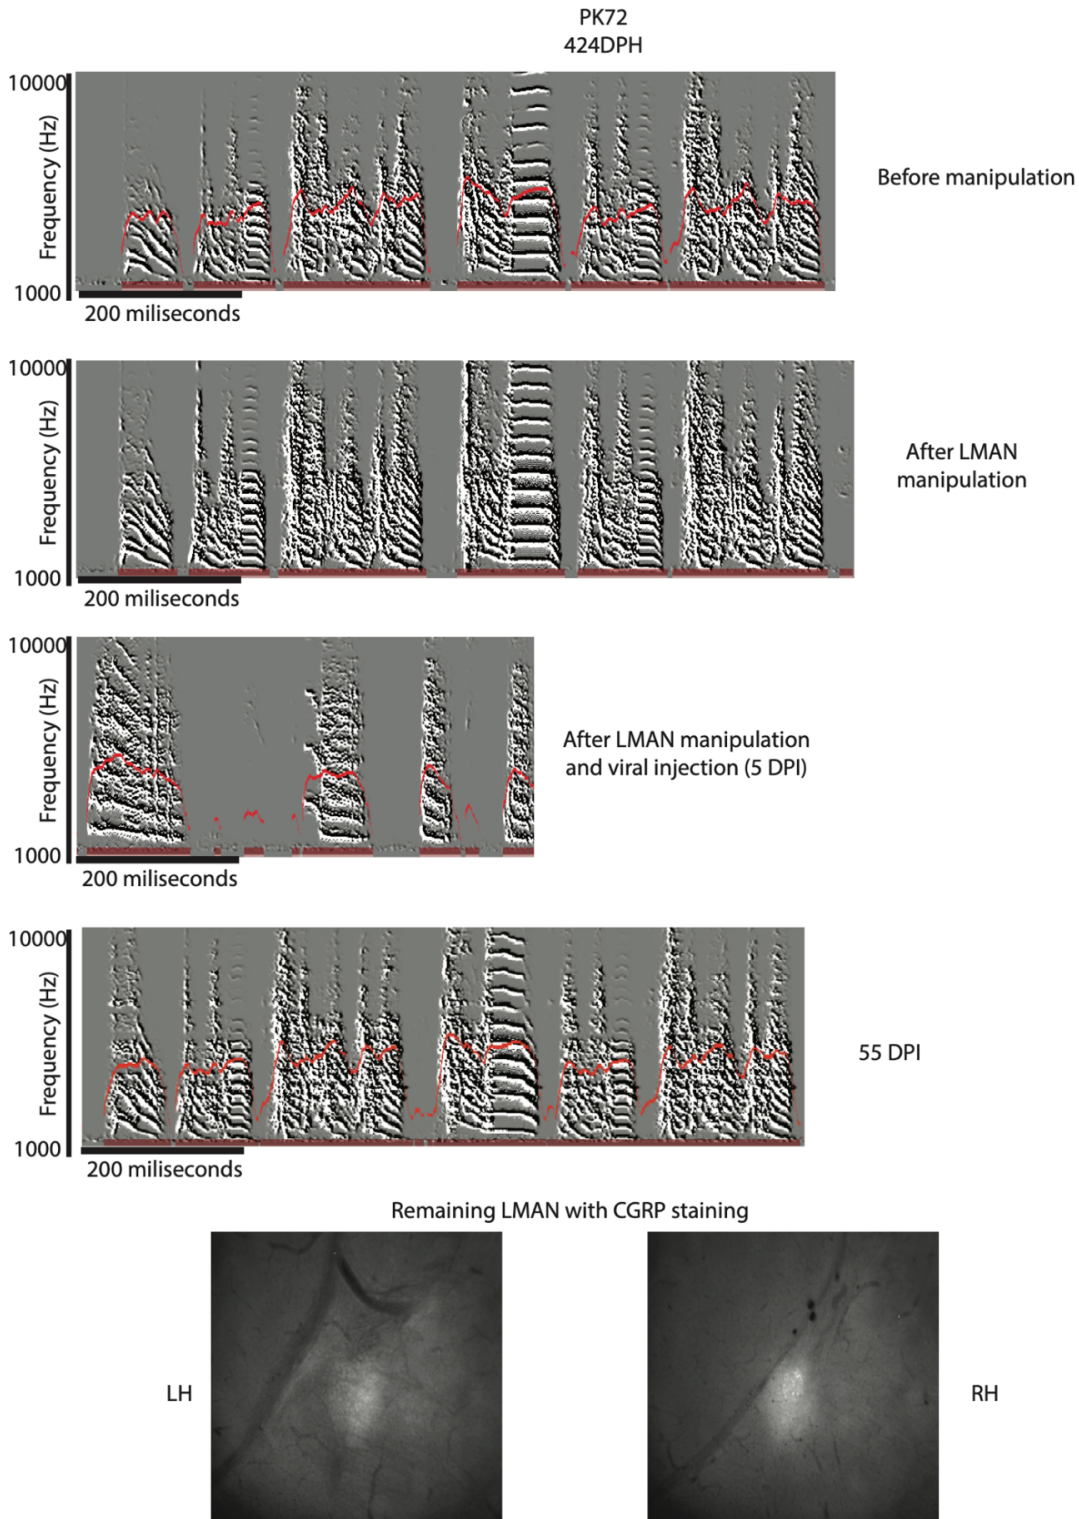

955

956 *Supplementary Figure 5: Song degradation and recovery after chronic removal of inhibition in an animal without LMAN. Spectrograms 957 are showing the song of the animal before and after LMAN lesion at 5 and 55 days after viral injection (dpi). The histology images 958 indicate the amount of LMAN left (based on CGRP staining) in the left (LH) and right (RH) hemispheres.*

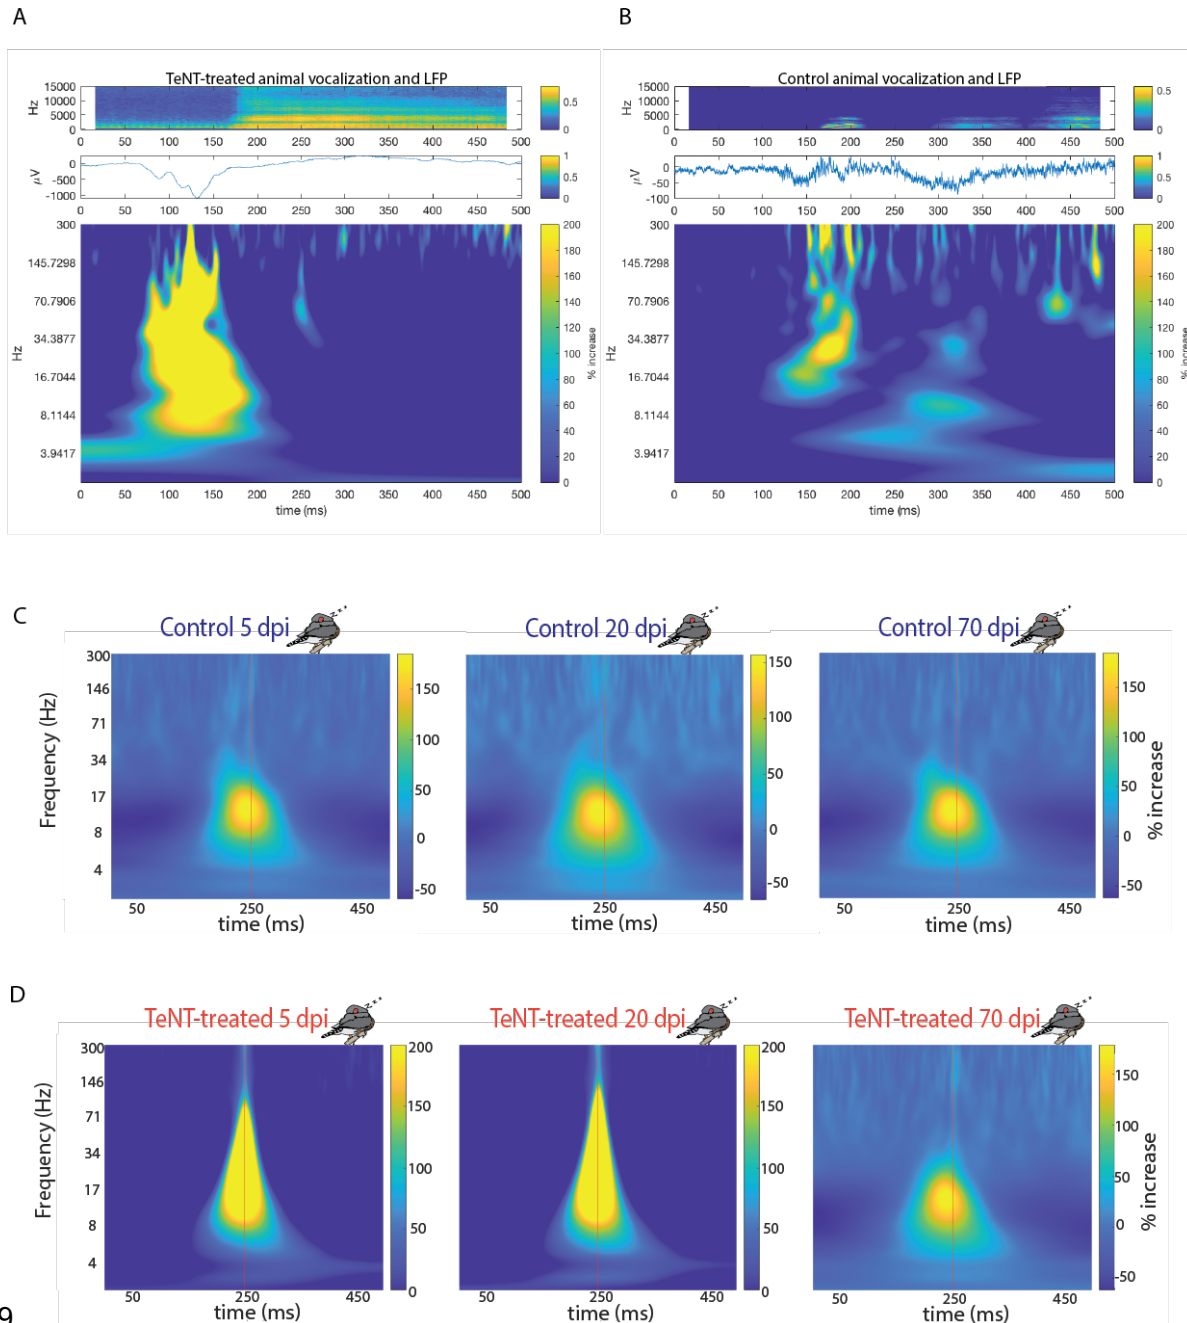

959

960 **Supplementary Figure 6: Example electrophysiology traces averaged over 5 instances of normal or 5 instances of degraded**  
 961 **vocalizations and averages of sleep voltage deflections.** **A** Averaged spectrogram of degraded vocalization ( $n=5$ ) 5 days post-electrode-  
 962 implantation in a chronically recorded TeNT-treated animal. The plot below the spectrogram shows the raw averaged trace of  
 963 extracellular recording. Below the raw trace is the averaged continuous wavelet transform of the local field potentials (LFP, 1-300Hz).  
 964 The plots show a large deflection event (similar to those seen during lights-off in Figures 2 and 3) right before the onset of the  
 965 vocalization in the TeNT-treated animal. **B** Averaged song spectrogram ( $n=5$ ) 5 days post-electrode-implantation from a chronically  
 966 recorded control animal. The plot below the spectrogram shows the raw averaged trace of extracellular recordings. Below the raw  
 967 trace is the averaged continuous wavelet transform of the local field potentials (LFP, 1-300 Hz). The averaged control song shows more  
 968 and smaller amplitude deflections mostly during the vocalization compared to the TeNT-treated vocalization. **C-D** Spectral  
 969 decomposition of local field potentials (LFPs) of the averaged deflections during night time at 5, 20, and 60 dpi in one control (C) and  
 970 one TeNT-treated animal (D). The vertical red line depicts the trough of the raw deflection trace. The % increase is the relative increase  
 971 compared to non-deflection events in the same recording timeframe of the same animal (Methods). Deflections of TeNT-treated animals

972 in the 15-30 Hz range were approx. 27 times larger than those in control animals at 5 dpi. These differences are statistically significant  
973 between control and TeNT-treated groups, but not within the control group ( $p=0.7631$  between controls,  $p<10^{-35}$  between all other  
974 pairs). The deflections across all animals and frequencies become more similar by 60 dpi (15-30 Hz:  $p=0.1371$  between controls,  $p<10^{-6}$   
975 between all other pairs; 30-70 Hz:  $p=0.7493$  between controls,  $p<10^{-2}$  between all other pairs). For details on  
976 statistics see Methods.

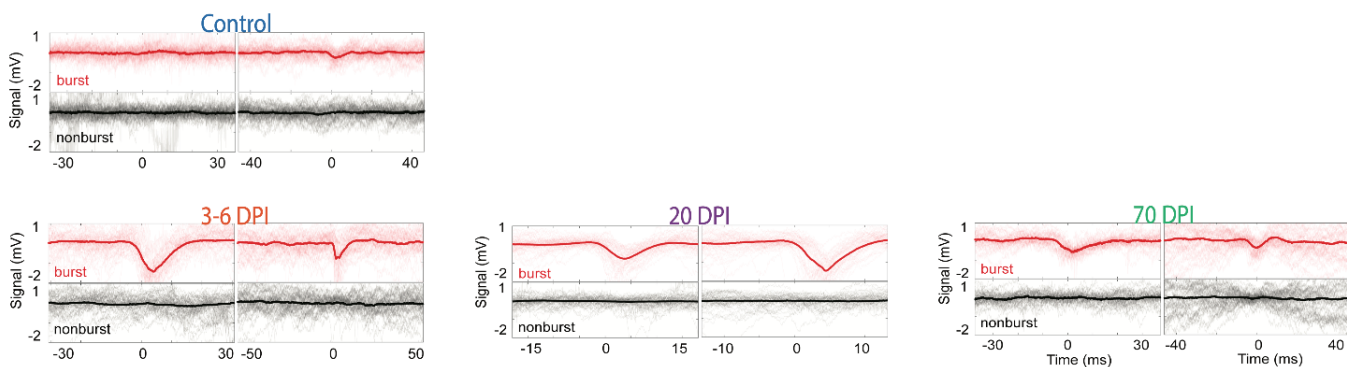

977 **Supplementary Figure 7: Example traces of raw deflections in the acute Neuropixel recordings during lights-**  
978 **off periods.** Control animals barely showed any visible deflection events, while TeNT-treated animals (example  
979 traces shown at 3-6, 20, and 70 dpi) displayed large amplitude voltage deflection events.

980  
981  
982  
983  
984  
985  
986  
987  
988  
989  
990  
991  
992  
993  
994  
995  
996  
997  
998  
999  
1000  
1001  
1002

1003 **Supplementary**  
 1004 **Figure 8:**  
 1005 Relationship between  
 1006 alpha or gamma  
 1007 oscillations during  
 1008 lights-off voltage  
 1009 deflection events and  
 1010 local neuronal firing  
 1011 in HVC and RA from  
 1012 the acute NPIX  
 1013 recordings **A** *The*  
 1014 *normalized*  
 1015 *probability*  
 1016 *distribution of*  
 1017 *neurons locally within*  
 1018 *HVC fire during a*  
 1019 *specific phase (angle)*  
 1020 *of the gamma (30-40*  
 1021 *Hz) oscillations*  
 1022 *extracted from the*  
 1023 *LFP signal of the*  
 1024 *averaged deflection*  
 1025 *events at 3-6 dpi (n=4*  
 1026 *animals), 20 dpi (n=4*  
 1027 *animals), 70 dpi (n=2*  
 1028 *animals that*  
 1029 *recovered their song*  
 1030 *by then). There was a*  
 1031 *slight change in local*  
 1032 *neuronal firing to the*  
 1033 *angle and locking*  
 1034 *precision to gamma*  
 1035 *oscillations that*  
 1036 *resembled control by*  
 1037 *70 dpi.* **B** *Normalized*  
 1038 *probability*  
 1039 *distribution of*  
 1040 *neurons locally within*  
 1041 *RA fire during a*  
 1042 *specific phase (angle)*  
 1043 *of the alpha (1-10 Hz)*  
 1044 *oscillations in HVC*  
 1045 *extracted from the LFP signal of the averaged deflection events at 3-6 dpi, 20, 70 dpi. No change in RA spontaneous neuronal firing*  
 1046 *to alpha oscillations in HVC during the deflection events over the course of the manipulation.* **C** *Normalized probability distribution*  
 1047 *of neurons locally within RA fire during a specific phase (angle) of the gamma (30-40 Hz) oscillations in HVC extracted from the LFP*  
 1048 *signal of the averaged deflection events at 3-6, 20, and 70 dpi. We observed no change in RA spontaneous neuronal firing to the gamma*  
 1049 *oscillations in HVC during the deflection events over the course of the manipulation.*

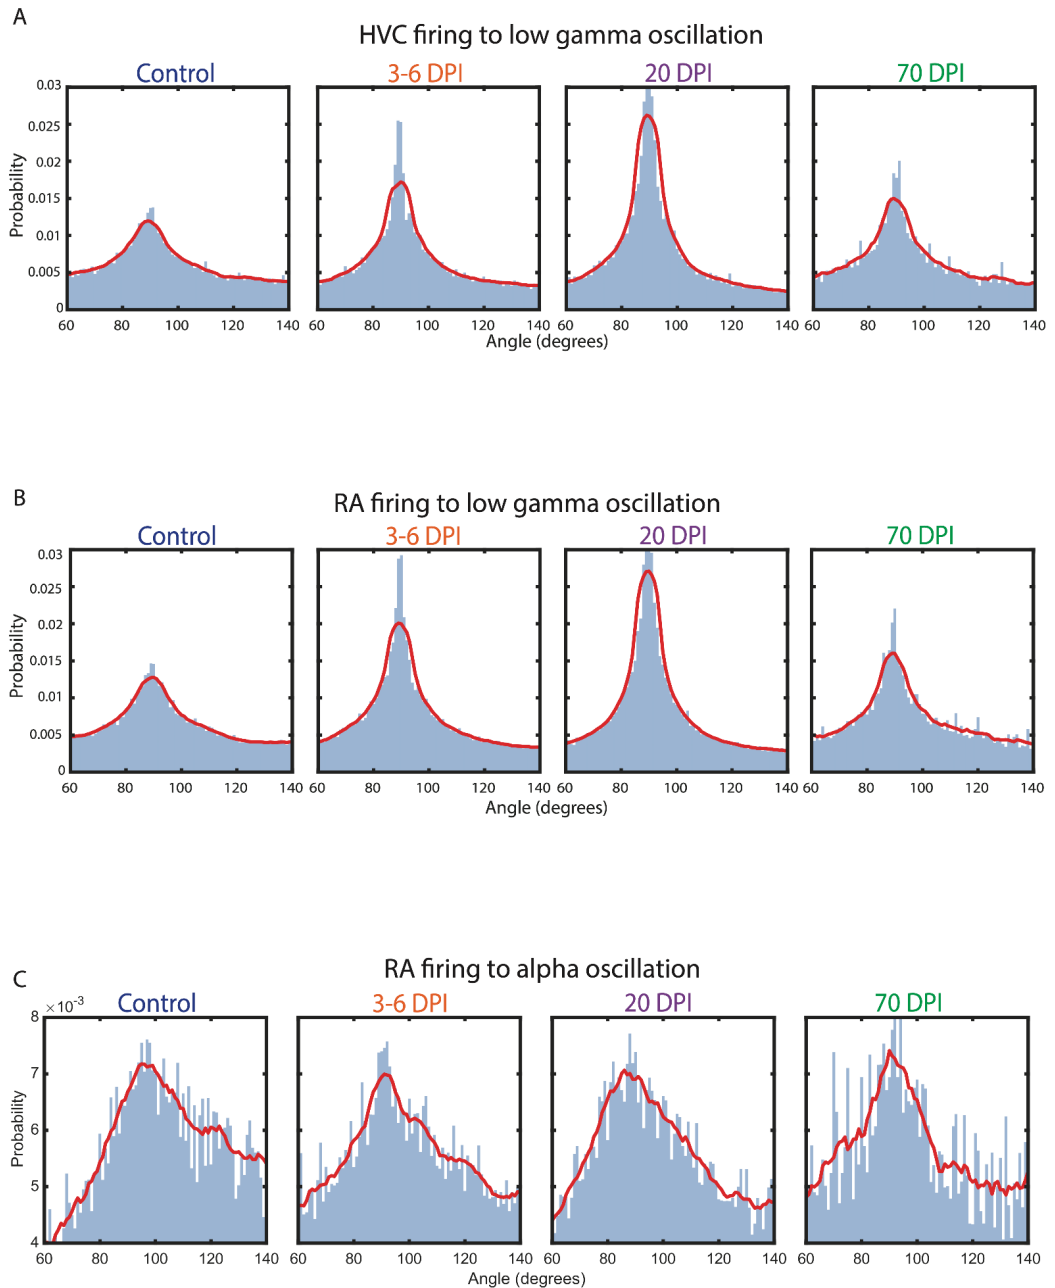



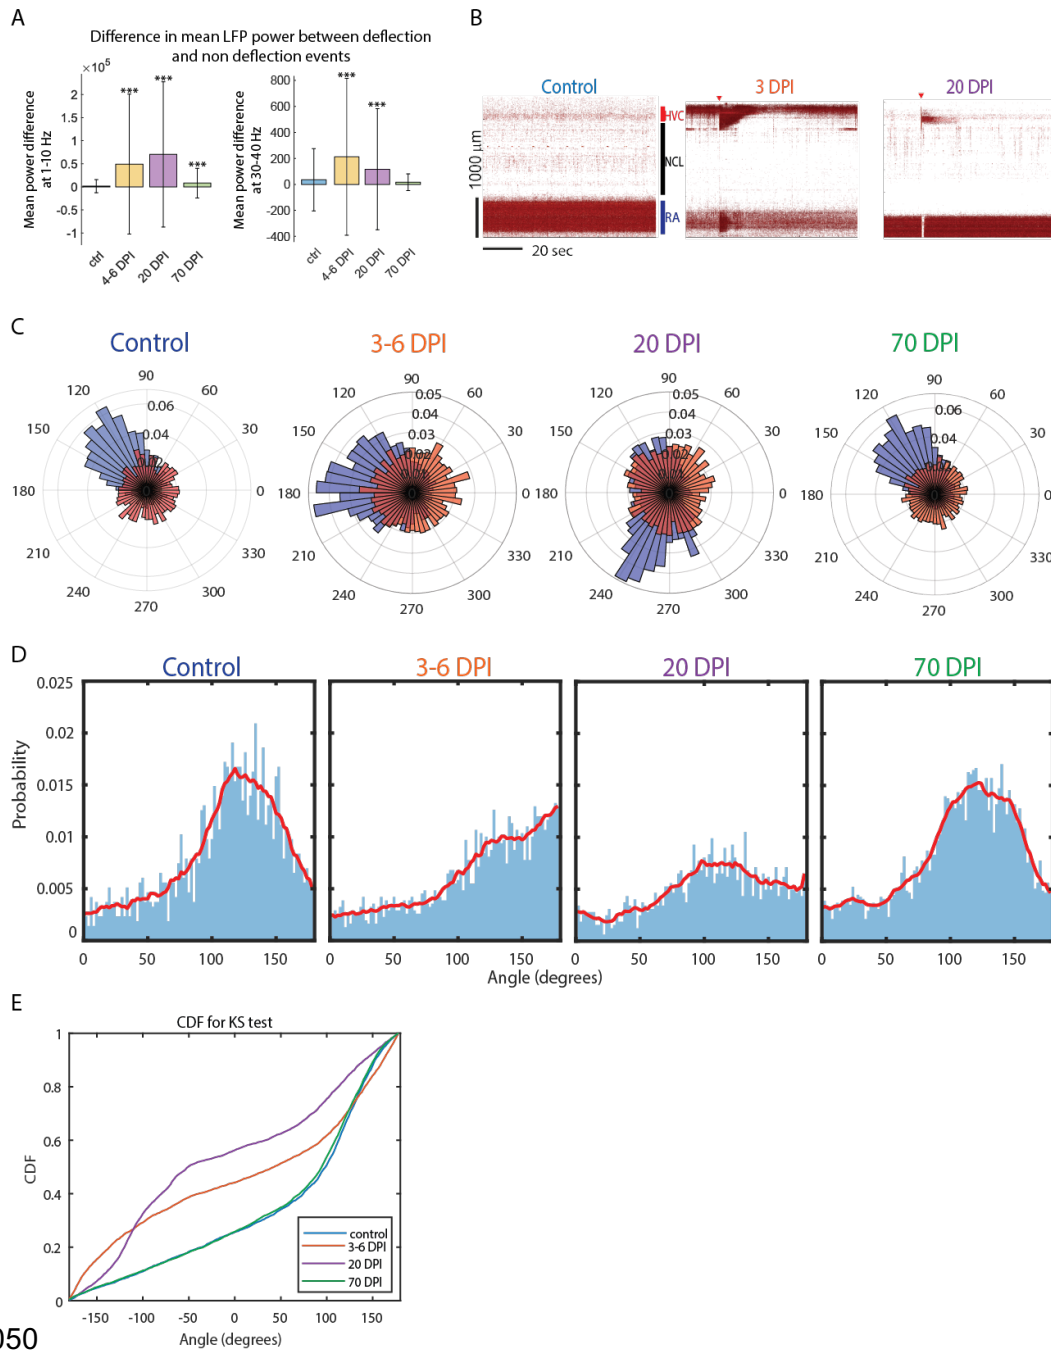

1050

1051 **Supplementary Figure 9: Quantification of the angle relationship between alpha (1-10 Hz) and gamma (30-40 Hz) frequencies during**  
 1052 **deflection events in control and TeNT-treated animals during acute head-fixed recordings.** **A:** The average difference in power (at alpha,  
 1053 1-10 Hz, and low gamma 30-40 Hz frequency ranges) between voltage deflection and non-deflection events in control, 3-6, 20, 70 dpi.  
 1054 The power content in the alpha range increased in a statistically significant way (Wilcoxon, rank sum test) between control and 3-6  
 1055 ( $p=2.9*10^{-36}$ ), 20 ( $p=8.6*10^{-167}$ ), 70 ( $p=5.4*10^{-4}$ ) dpi animals. However, the increase in power between control and 3-6  
 1056 ( $p=2.2*10^{-37}$ ), 20 ( $p=6.3*10^{-27}$ ) dpi is statistically significant but returns to control level by 70 ( $p=0.37$ ) dpi. The stars above the  
 1057 bar plots (\*) indicate statistical significance (\* :  $p < 0.005$ , \*\* :  $p < 0.01$ , \*\*\* :  $p < 0.001$ ). **B** Examples of neuronal activity in a control  
 1058 animal, TeNT-treated animals at 3 and 20 dpi. The red arrows highlight the “superbursts” or extreme firing levels within HVC and RA  
 1059 which we observed in 3 animals (two animals at 3-4 dpi and one at 20 dpi) in a total of seven instances. **C:** The polar histograms of the  
 1060 angle of the alpha oscillations (1-10Hz) at the maximum amplitude of the gamma oscillation (30-40 Hz) during deflection events. The  
 1061 red distribution represents a randomly shuffled dataset, while the blue is the true distribution of angles in control ( $n=3$ ), and TeNT-  
 1062 treated animals at 3-6 dpi ( $n=4$ ), 20 dpi ( $n=4$ ) and 70 dpi ( $n=4$ ) during deflection events. **D:** Relationship of alpha and low gamma

1063 oscillations during deflection events in control (n=3), 3-6 (n=4), 20 (n=4), and 70 (n=2 animals) dpi animals (over animals and  
1064 conditions). The probability distribution of a specific angle of the low-frequency oscillation at the maximum amplitude of the gamma  
1065 oscillation. **E:** The results of the Kolmogorov-Smirnov test on the cumulative density function (CDF) to assess if the change in probability  
1066 distribution shown in C is statistically significant from control distributions at 3-6, 20, and 70 dpi. The purple (20 dpi) and orange (3-  
1067 7 dpi) distributions differ significantly from the blue control and the 70 dpi green distributions. The 70 dpi population is not significantly  
1068 different from the control group.

1069

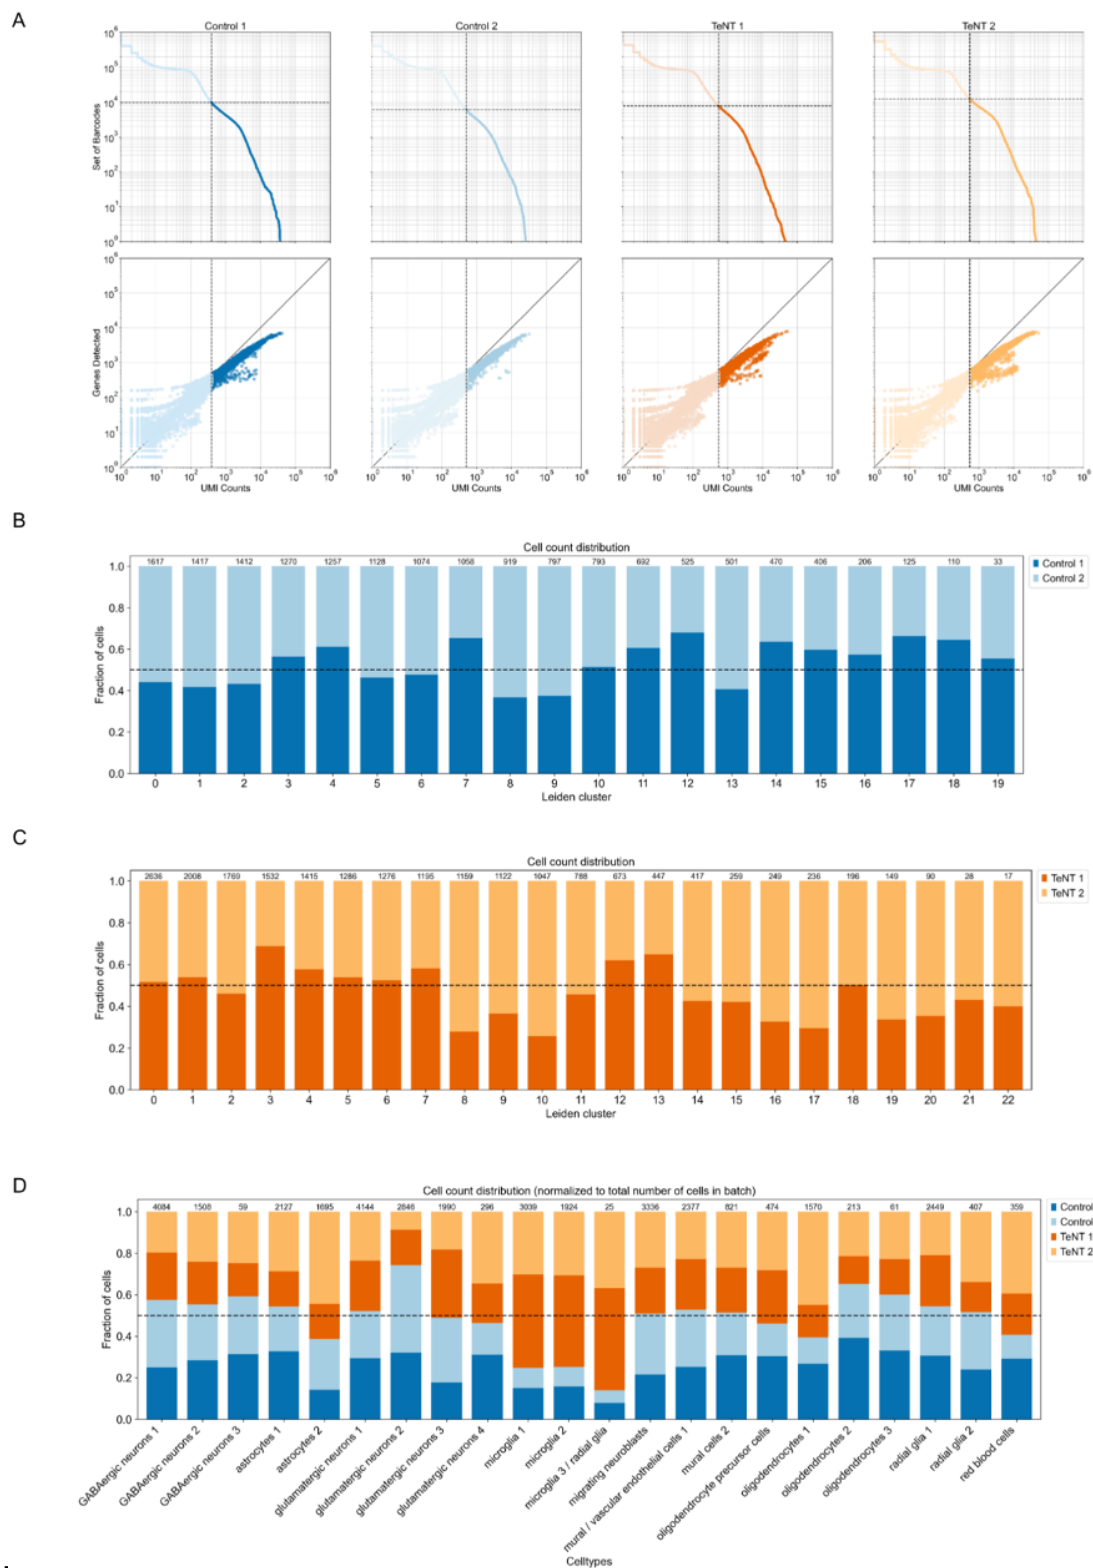

1071 **Supplementary Figure 10: Quality control of the single-cell RNA sequencing HVC datasets from control and TeNT-treated animals at**  
 1072 **25 days post-injection (dpi).** **A** “Knee plots” showing the set of barcodes (top row) and number of genes detected (bottom row) over  
 1073 UMI counts. The dashed lines depict the quality filtering cutoff. **B-C** Barplot depicting the fraction of cells from each replicate per  
 1074 cluster for control (B) and TeNT (C), normalized (by dividing) to the total number of cells in each replicate. Control and TeNT datasets

1075 were clustered separately using the Leiden algorithm. The equal distribution of replicates across the clusters suggests that technical  
 1076 effects do not dominate the clusters. Thus, we did not perform batch correction. The numbers on top of the bars indicate the total number  
 1077 of cells in each cluster. **D** Barplot depicting the fraction of cells from each dataset in the cell type clusters obtained after jointly clustering  
 1078 the control and TeNT datasets. The numbers on top of the bars indicate the total number of cells in each cluster.

1079

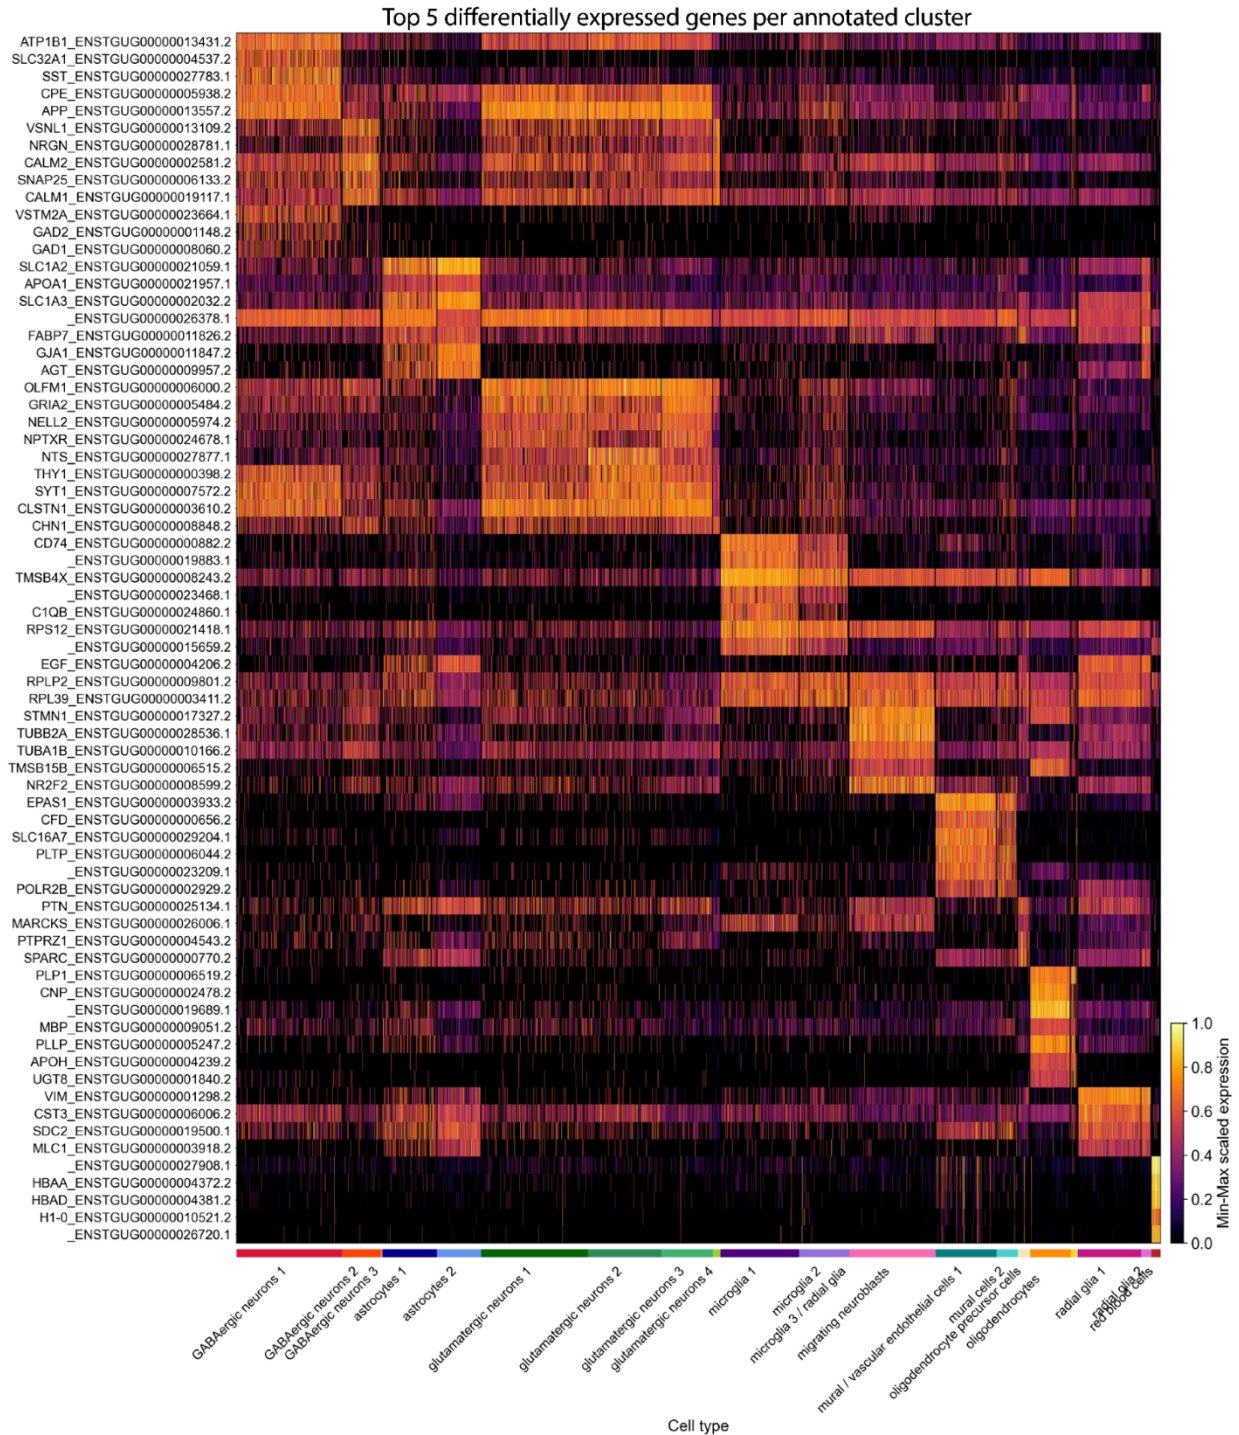

1080 **Supplementary Figure 11: Heatmap of top 5 differentially expressed genes per annotated cell type/cluster obtained by single-cell RNA**

1081 **sequencing of HVC from control and TeNT-treated birds at 25 dpi.** Differentially expressed genes between clusters were identified using

1082 **Scanpy's rank\_genes\_groups** (*p* values were computed using a *t*-test and were adjusted with the Bonferroni method for multiple testing.

1083 They were then confirmed by comparison to *p* values generated with the nonparametric Wilcoxon test with Bonferroni correction). The  
1084 heatmap depicts the min-max scaled expression for each gene.  
1085

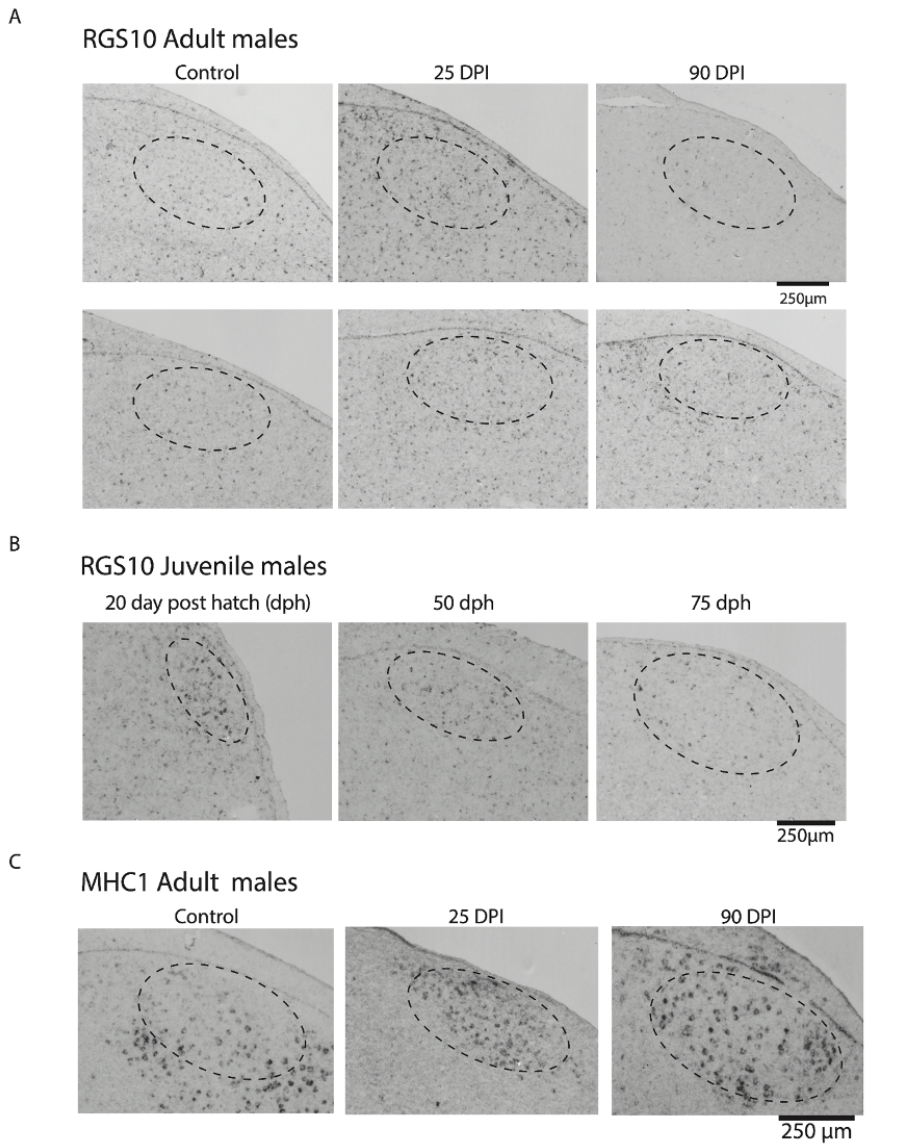

1086  
1087 **Supplementary Figure 12: In situ hybridization of microglia marker gene *RGS10* in adult male control, TeNT-treated and juvenile male**  
1088 ***HVC* & *MHC1* gene in adult male control and TeNT-treated *HVC*.** **A** Histological sections of *HVC* (in control and TeNT-treated animals  
1089 at 25 and 90 dpi) after in situ hybridization of RNA probes for *RGS10* (a gene marker for microglia). **B** Histological sections of *HVC*  
1090 in naive juvenile males (at 20, 50, and 75 days post-hatching (dph)) after in situ hybridization of RNA probes for *RGS10*. **C** Histological  
1091 sections of *HVC* (from control and TeNT-treated animals at 25 and 90 dpi) after in situ hybridization of RNA probes for *MHC1*.  
1092 Black/darker dots indicate enzyme reactions resulting in successful probe localization and suggest target gene expression.

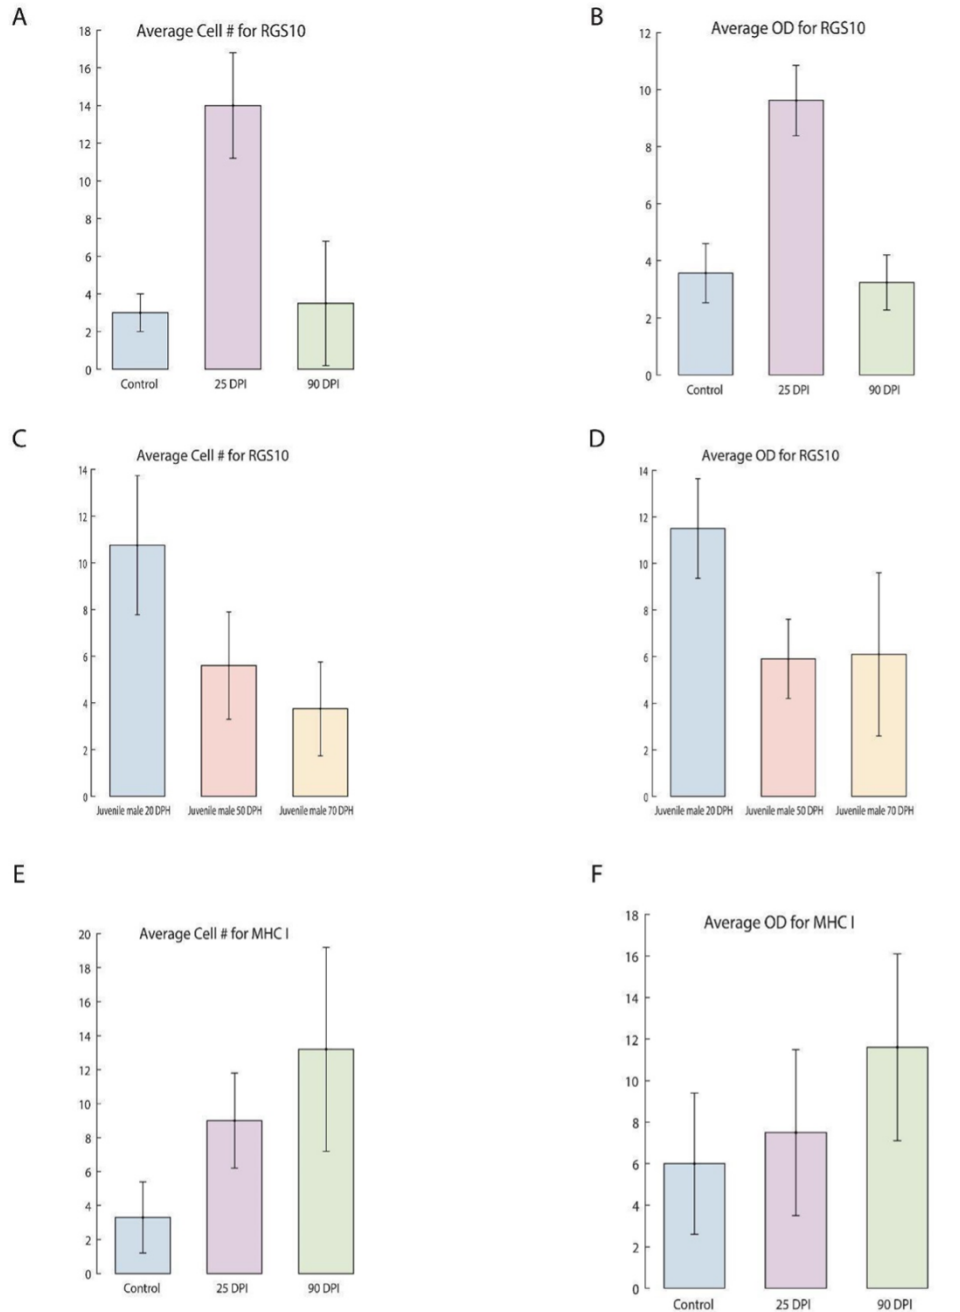

1093

1094 **Supplementary Figure 13: Quantification of the in situ hybridization against microglia marker gene RGS10 in adult male control,**

1095 **TeNT-treated and juvenile male HVC; and MHC1 in adult male control, TeNT-treated animals. A-B** Quantification of the in situ

1096 hybridization for RGS10 between control (n=4 animals) and TeNT-treated animals at 25 dpi (n=4) and 90 dpi (n=4). **C-D**

1097 Quantification of the in situ hybridization for RGS10 between juvenile males at 20, 50, and 70 days post-hatching (dph) (n=4). **E-F**

1098 Quantification of the in situ hybridization for MHC1 between control (n=4) and TeNT-treated animals at 25 (n=4) and 90 dpi (n=4).

1099 Error bars represent standard deviation.

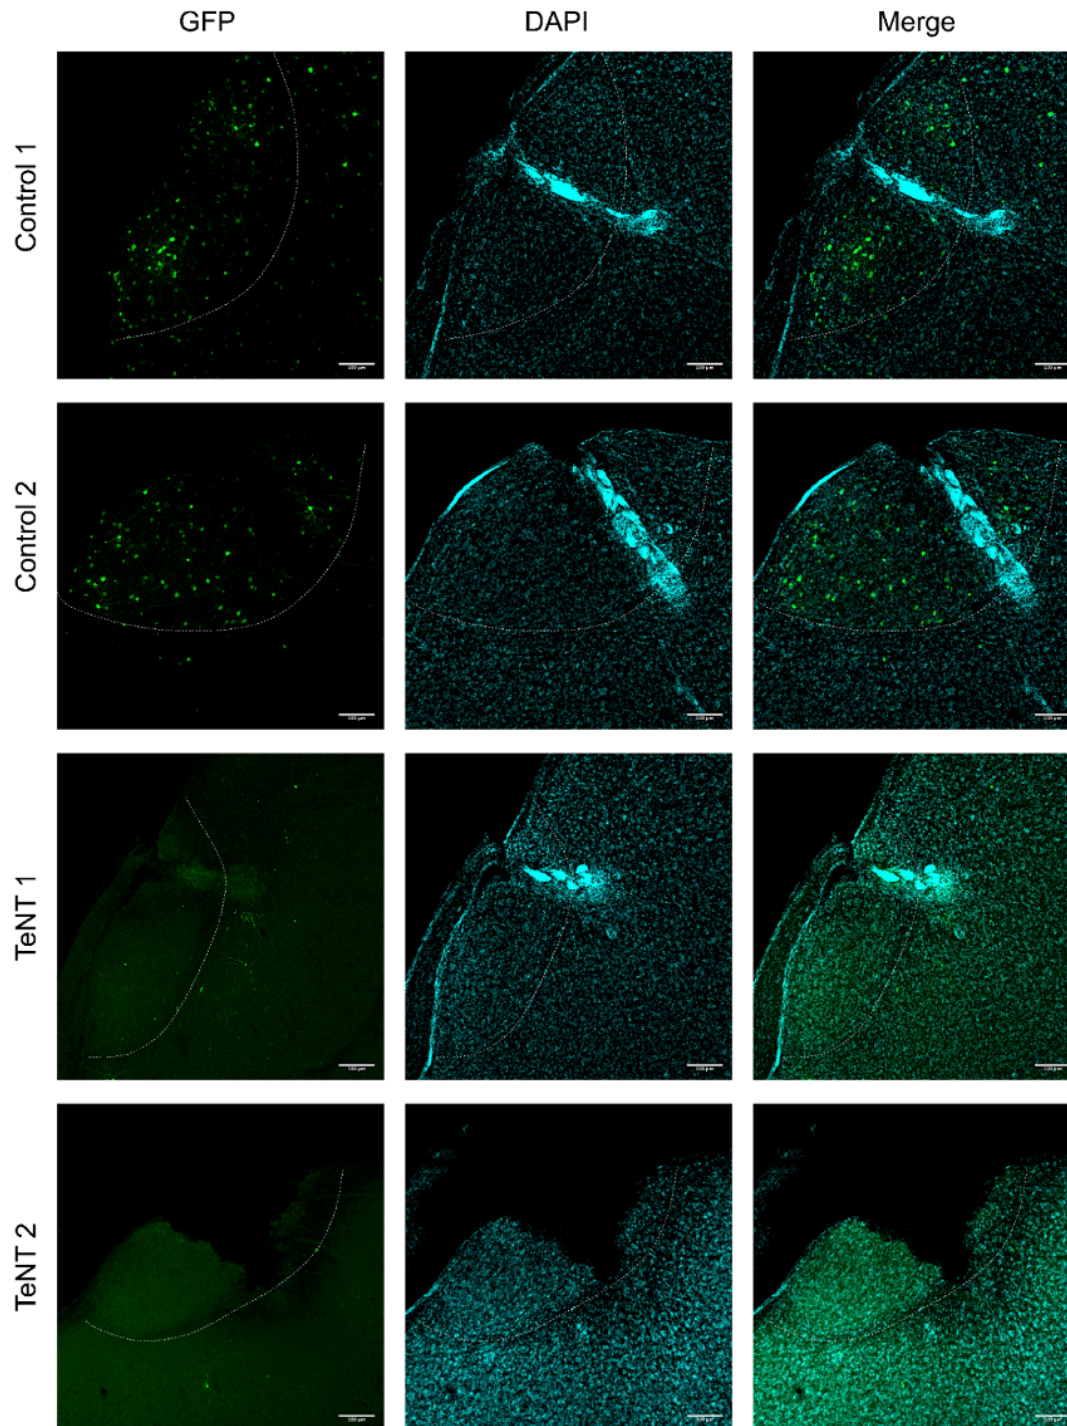

1100  
1101 **Supplementary Figure 14:** *Histology of electrode array location in HVC in the chronically implanted animals.* The white dotted line  
1102 outlines HVC. Some sections display missing tissue due to the removal of the electrodes after perfusion of the animals. The stronger  
1103 cyan signal indicates glial scar formation around the electrode array, which provides an approximation of the location of the electrodes.  
1104 Electrodes located closer to the bottom of HVC close to the shelf were not used for analysis.

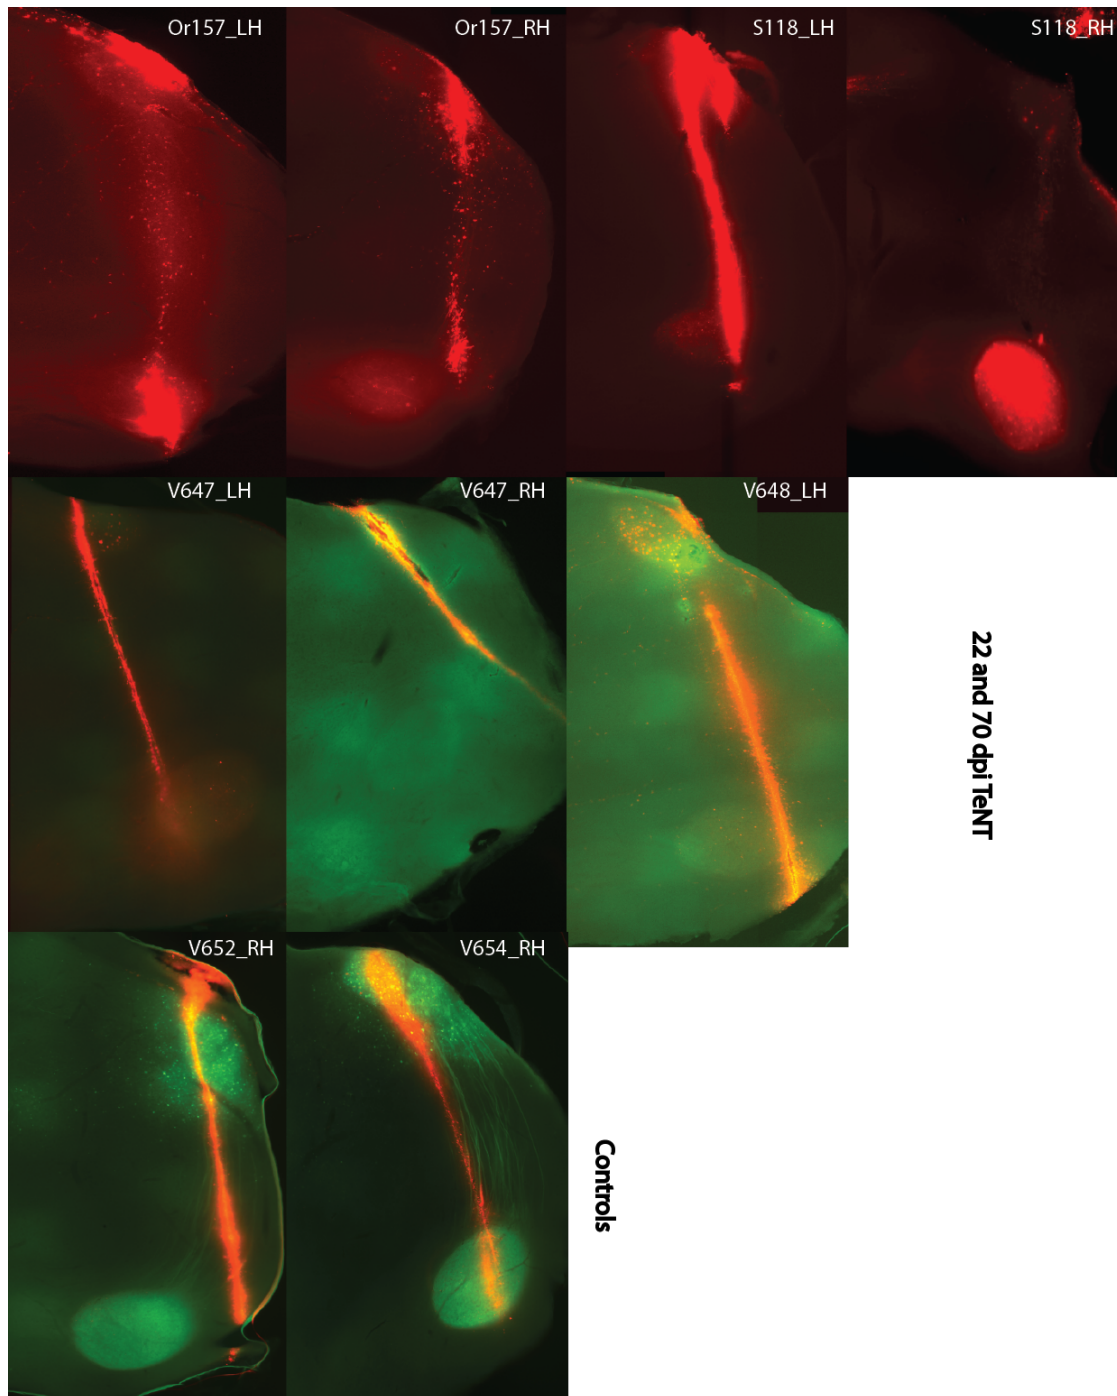

1105

1106 **Supplementary Figure 15:** Histology to confirm the high-density silicone electrode location in the acute head-fixed animal recordings.

1107 The red trace represents the electrode location. The green trace represents the second electrode location in animals that were recorded

1108 twice, 40 days apart. The white labels represent the animal IDs. "LH" and "RH" stands for left and right hemisphere, respectively.



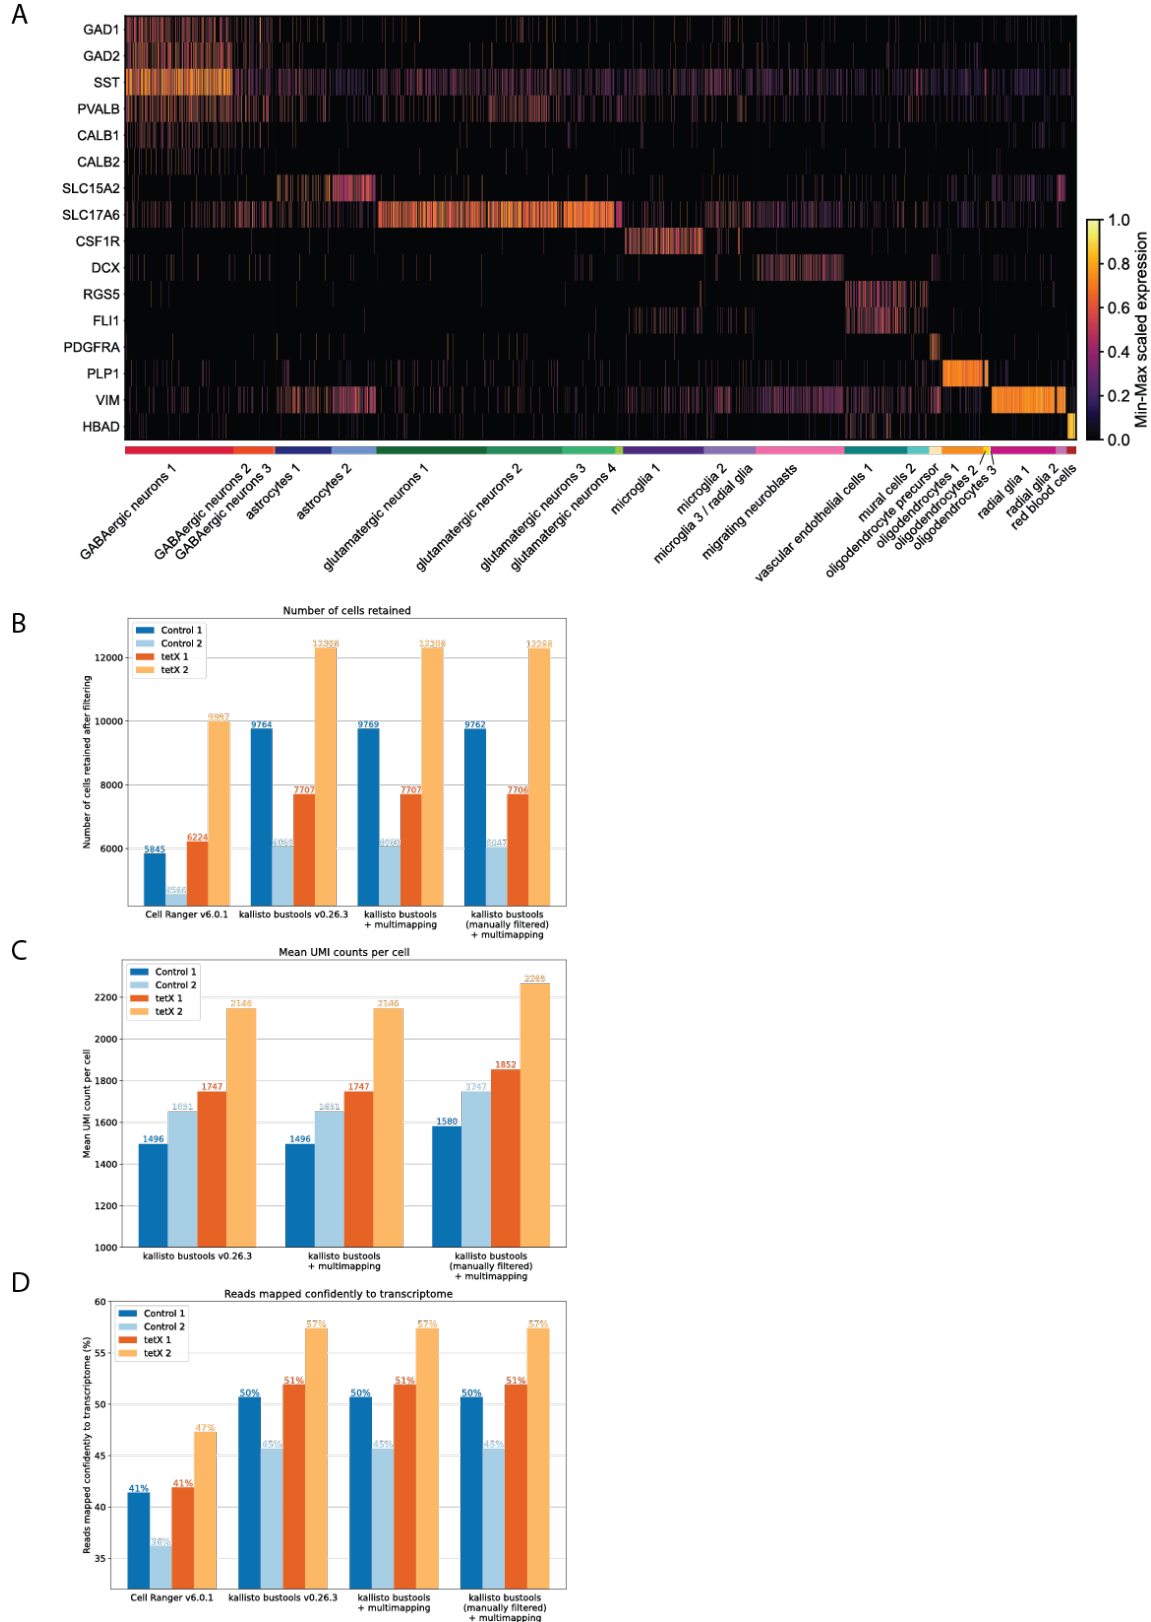

1109

1110 *Supplementary Figure 16: Comparison of different pre-processing methods for the HVC single-cell RNA sequencing datasets and*  
 1111 *marker genes. A Heatmap showing min-max scaled expression of cell type marker genes for each cell type (data from both control and*  
 1112 *TeNT-treated animals). B Number of cells retained after quality control for each dataset and alignment method. C Mean UMI counts*

1113 *per cell for each dataset and pre-processing method. D Percentage of reads confidently mapped to transcriptome for each pre-*  
 1114 *processing method.*

A

| Deflection durations (half-widths) in ms (mean ± SD) |                     |                     |                     |                     |                     |                     |
|------------------------------------------------------|---------------------|---------------------|---------------------|---------------------|---------------------|---------------------|
|                                                      | 3-5 DPI             | 15 DPI              | 30 DPI              | 45 DPI              | 60 DPI              | 75 DPI              |
| Control animal 1 (OR295)                             | 44.2083<br>±16.0885 | 50.7321<br>±21.5322 | 47.7079<br>±16.4028 | 49.5889<br>±18.5678 | 45.4170<br>±15.4166 | 48.2883<br>±18.5856 |
| Control animal 2 (PK31)                              | 43.9120<br>±15.5607 | 46.5072<br>±17.6237 | 36.7974<br>±15.6453 | 42.4989<br>±15.8985 | 37.8048<br>±15.2497 | 35.3157<br>±15.2297 |
| TeNT-treated animal 1 (B138)                         | 24.7074<br>±11.0296 | 20.4568<br>±5.7482  | 26.2938<br>±10.4427 | 32.1460<br>±13.1017 | 36.8212<br>±15.3777 | 41.4122<br>±15.9937 |
| TeNT-treated animal 2 (OR296)                        | 34.6744<br>±10.7396 | 29.2852<br>±8.3464  | 29.5713<br>±9.5446  | 31.4171<br>±11.5461 | 39.8151<br>±10.5067 | 42.9507<br>±14.0682 |

B

| Deflection amplitudes in μV (mean ± SD) |                        |                        |                        |                        |                        |                       |
|-----------------------------------------|------------------------|------------------------|------------------------|------------------------|------------------------|-----------------------|
|                                         | 3-5 DPI                | 15 DPI                 | 30 DPI                 | 45 DPI                 | 60 DPI                 | 75 DPI                |
| Control animal 1 (OR295)                | -136.3911<br>±28.7491  | -155.0317<br>±49.3434  | -151.5708<br>±35.8116  | -149.0358<br>±34.9365  | -152.4109<br>±33.1907  | -150.5303<br>±33.8846 |
| Control animal 2 (PK31)                 | -111.9867<br>±20.8258  | -117.1694<br>±26.5227  | -133.9981<br>±26.5174  | -130.6166<br>±25.9310  | -138.6591<br>±26.7510  | -135.2756<br>±25.9969 |
| TeNT-treated animal 1 (B138)            | -538.6617<br>±307.8410 | -816.7580<br>±371.9481 | -705.8811<br>±267.1738 | -422.1097<br>±143.1100 | -306.8821<br>±101.9335 | -261.2531<br>±80.5379 |
| TeNT-treated animal 2 (OR296)           | -174.6613<br>±39.6156  | -251.7470<br>±70.1546  | -337.3158<br>±94.5369  | -525.5973<br>±157.8933 | -228.3434<br>±48.9163  | -162.6949<br>±35.6879 |

111  
 1116 **Supplementary Table 1: Amplitudes and durations of the chronic voltage deflections measured throughout the recording. A** Mean  
 1117 *duration (calculated as the distance from the onset to the half-width point of the event) in ms of voltage deflection events with standard*  
 1118 *deviation, each row represents an event from one control (Or 295, PK31) or TeNT-treated (B138, Or296) animal. The data was*  
 1119 *sampled at 3-5, 15, 30, 45, 60, and 75 dpi. B Mean amplitudes (in μV) of voltage deflection events with standard deviation.*

1120

| Dataset (short name) | Species             | Condition     | Brain area             | Replicate # | Technology | Pre-processing tool | # of cells retained after QC | Sequencing depth (number of reads processed) | Reads mapped confidently to transcriptome (%) | Mean UMI count per cell | Total UMI count |
|----------------------|---------------------|---------------|------------------------|-------------|------------|---------------------|------------------------------|----------------------------------------------|-----------------------------------------------|-------------------------|-----------------|
| C1                   | Taeniopygia guttata | cag-neonGreen | HVC (both hemispheres) | 1           | 10xv3      | kallisto bustools   | 9,763                        | 744,473,151                                  | 50.7                                          | 1580.8531               | 15,433,015      |
| C2                   | Taeniopygia guttata | cag-neonGreen | HVC (both hemispheres) | 2           | 10xv3      | kallisto bustools   | 6,047                        | 787,232,472                                  | 45.7                                          | 1747.639                | 10,568,132      |
| E1                   | Taeniopygia guttata | dlx-TeNT-GFP  | HVC (both hemispheres) | 1           | 10xv3      | kallisto bustools   | 7,706                        | 867,768,600                                  | 51.9                                          | 1852.4215               | 14,274,784      |
| E2                   | Taeniopygia guttata | dlx-TeNT-GFP  | HVC (both hemispheres) | 2           | 10xv3      | kallisto bustools   | 12,288                       | 810,253,355                                  | 57.4                                          | 2265.4258               | 27,837,586      |

1121 *Supplementary Table 2: Overview of single-cell RNA sequencing datasets.*
